# Supplementary material for: Increased Resection at DSBs in G2-Phase Is a Unique Phenotype Associated with DNA-PKcs Defects That Is Not Shared by Other Factors of c-NHEJ
Source: MDPI journal article supplement (doi:10.3390/cells11132099), 2022-07-02
Supplement: s1 [file s1]

# **Supplementary Information**

**Increased resection at DSBs in G<sub>2</sub>-phase is a unique phenotype associated with DNA-PKcs defects that is not shared by other factors of c-NHEJ**

Huaping Xiao Fanghua Li, Emil Mladenov, Aashish Soni, Veronika Mladenova, Bing Pan, Rositsa Dueva, Martin Stuschke, Beate Timmermann and George Iliakis

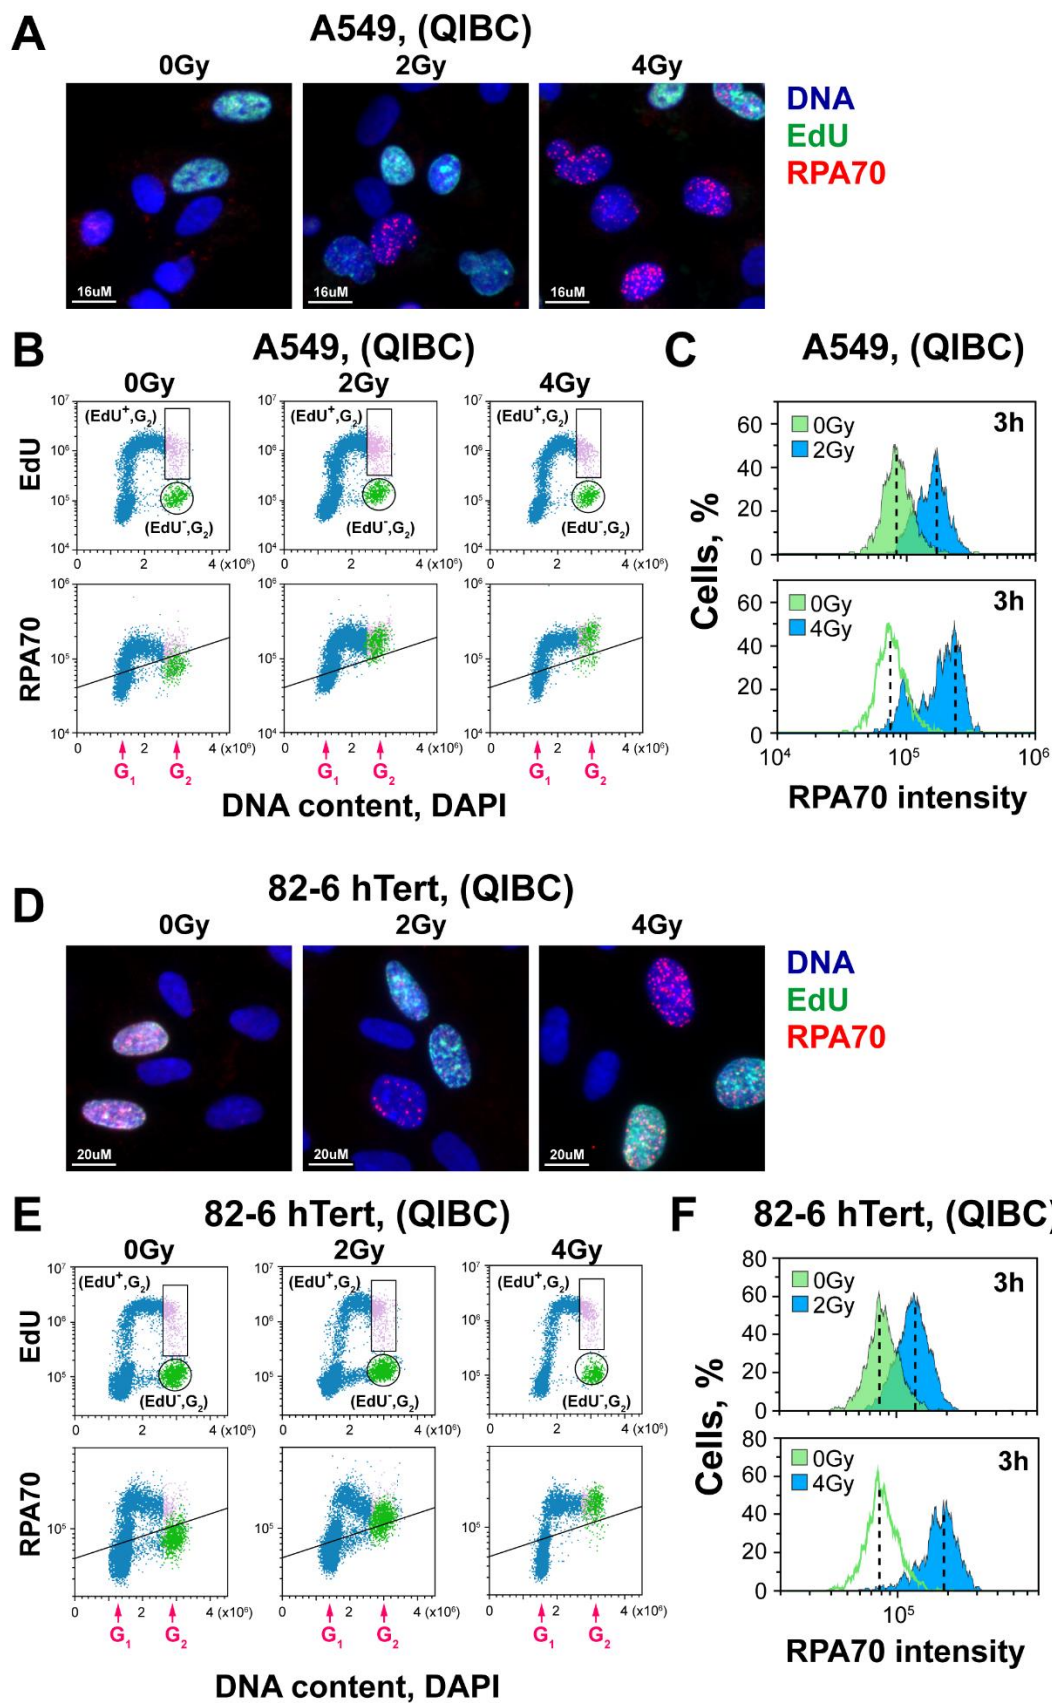

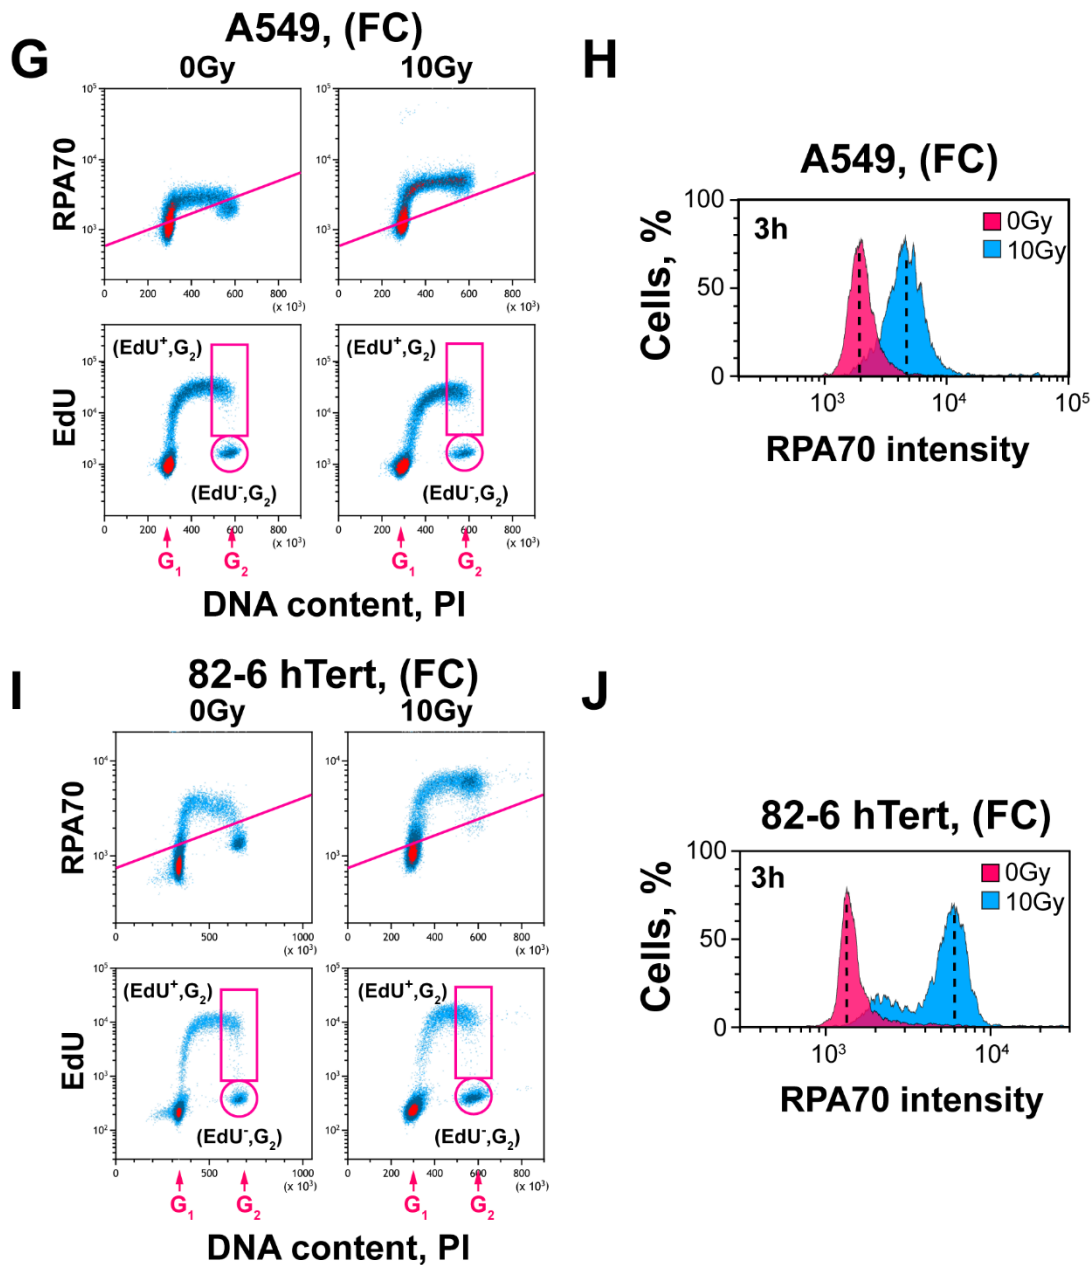

**Figure S1.** Outline of methodology to measure resection in  $G_2$ -phase. A) Representative AxioScan Z1 immunofluorescent images, obtained during QIBC analysis of A549 cells irradiated with 2 and 4 Gy X-rays. DNA was counterstained with DAPI and DAPI intensity (blue) was assessed to determine the progression of cells through the cell cycle. EdU intensity signal (green) was evaluated to determine whether cells were irradiated in S-phase, while the accumulation of RPA70 (red) onto chromatin was an indication for ongoing DNA end resection. B) Dot plots of RPA70, EdU and DAPI intensities obtained by QIBC analysis. The gates utilized to specifically select cells in different cell cycle phases

are also depicted. EdU positive (EdU<sup>+</sup>, violet) or EdU negative (EdU<sup>-</sup>, green) cells, represent the cells irradiated, respectively, in S- or G<sub>2</sub>-phase of the cell cycle. Counterstaining with DAPI allows the determination of DNA content, which reflects the cell cycle phase during analysis. For our experiments, we have selected cells irradiated in G<sub>2</sub>-phase and analyzed in the G<sub>2</sub>-phase (EdU<sup>-</sup>, G<sub>2</sub>-cells, green). C) The RPA70 intensity signals in the selected gates (EdU<sup>-</sup>, G<sub>2</sub>-cells) are shown as histogram plots. DNA end-resection after IR is visualized by the increase in the signal intensity between irradiated and non-irradiated cells. The ratio of the means between the two signal intensities is used as a parameter to quantitate resection in the experiments shown here. D, E and F) As in panels A, B and C for 82-6 hTert cells. G) Three parametric flow cytometry analysis of RPA70 signal intensity in A549 cells, showing the gates utilized to select cells irradiated in the G<sub>2</sub>-phase and analyzed in G<sub>2</sub>-phase of the cell cycle (EdU<sup>-</sup>, G<sub>2</sub>-cells). H) The RPA70 intensity signals in the selected gates (EdU<sup>-</sup>, G<sub>2</sub>-cells) are plotted as histogram plots. Other details as in Fig. S1A-C. I) As in panel G, for 82-6 hTert cells. J) As in panel H, for 82-6 hTert cells.

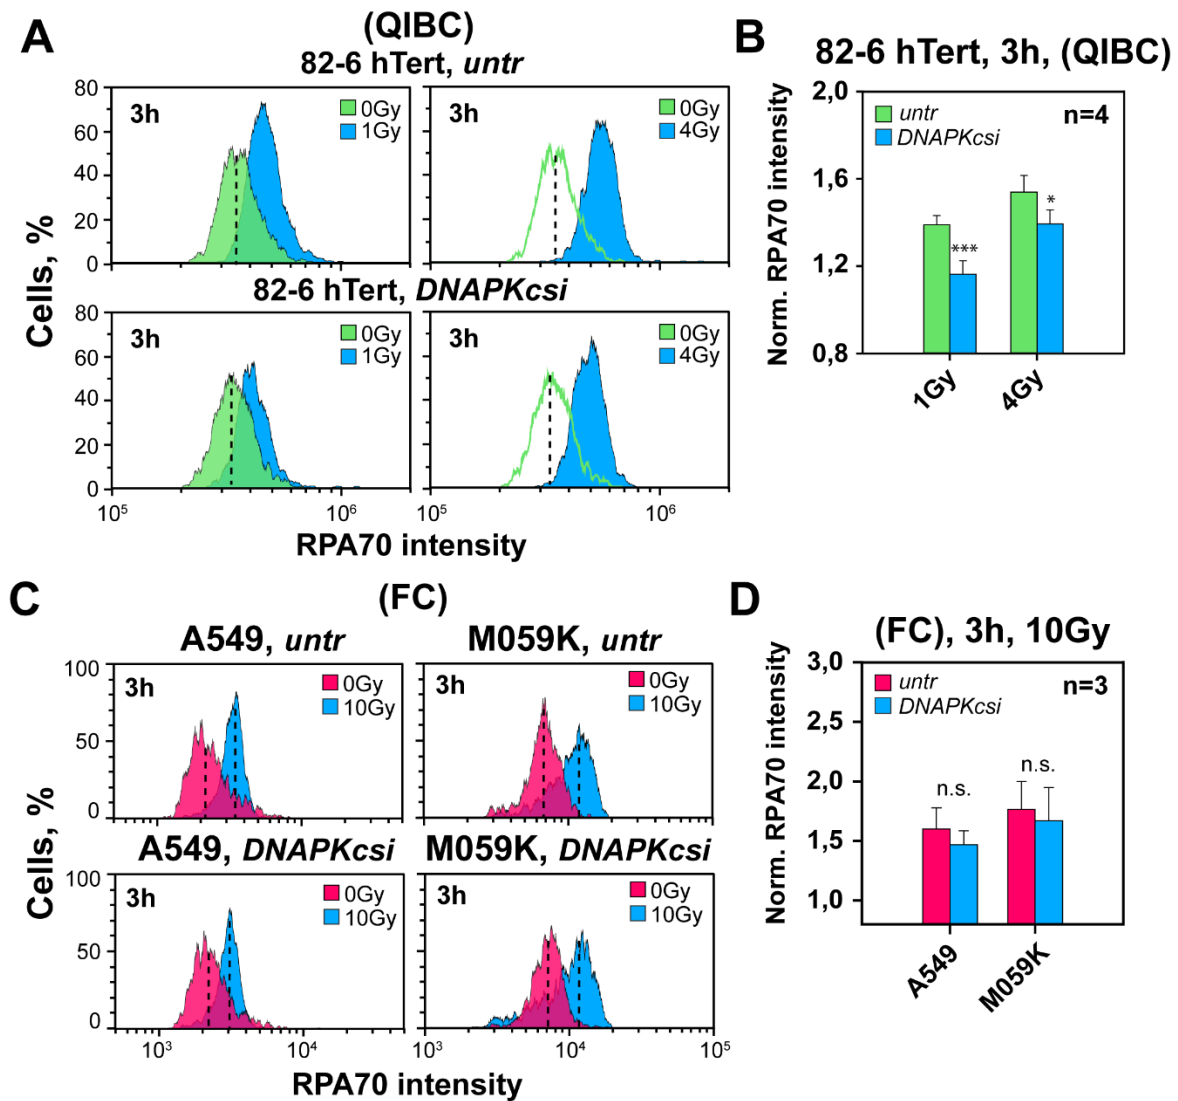

**Figure S2. Resection analysis in DNA-PKcs deficient cells.** A) QIBC analysis of RPA70 signal at DSBs in 82-6 hTert cells treated or not with *DNAPKcsi* (*NU7441*), 3 h after exposure to 1 Gy or 4 Gy. Other details as in Fig. 1B. B) Bar plot showing the normalized RPA70 signal intensity from three experiments, obtained as shown in panel A. C) FC-based analysis of resection in wild-type A549 and M059K cells, treated or not with *DNAPKcsi*. DNA end-resection is measured 3 h after exposure to 10 Gy (other details as in Fig. 1D). D) Bar plot showing the normalized RPA70 signal intensity from three experiments, obtained as shown in panel C.

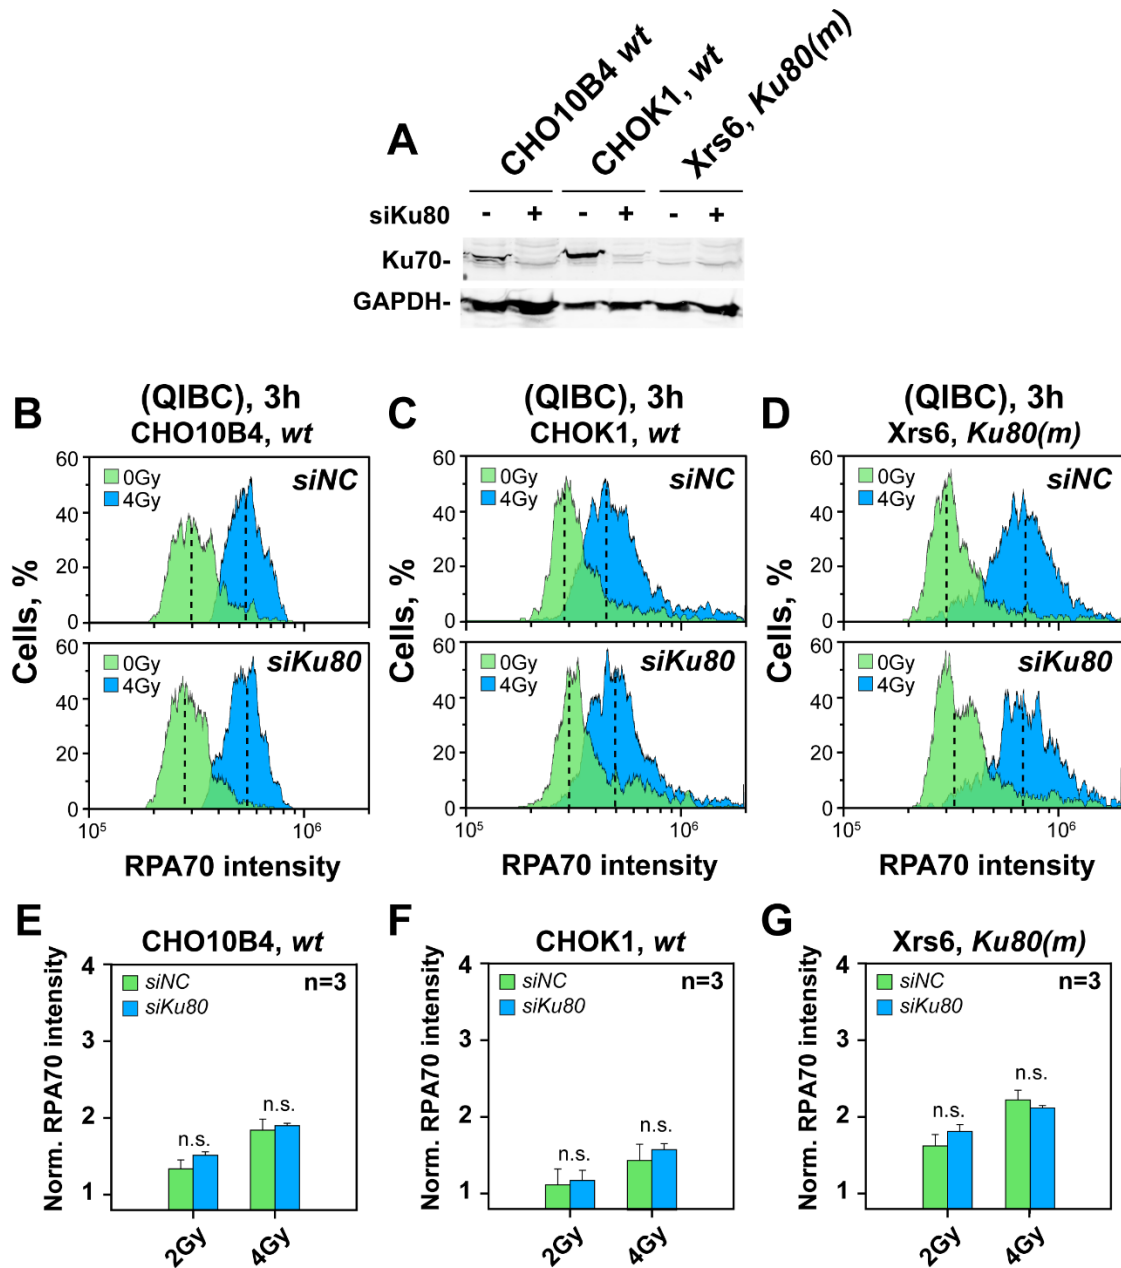

**Figure S3.** Resection analysis in CHO cells after knockdown of Ku. A) Western blot analysis showing the level of Ku70 in CHO10B4, CHOK1 and Xrs6 cells 24 h after transfection with a siRNA against Ku80, or with a non-specific control siRNA. KU70 serves here as a proxy for KU80, as the anti-KU80 antibody we used failed to recognize the hamster protein. B) Representative histograms of RPA70 intensity in mock transfected and Ku depleted CHO10B4(wt) cells, obtained by QIBC analysis 3 h after exposure to 2 or 4 Gy. C) As in panel B, for CHOK1(wt) cells. D) As in panel B, or the Ku80 mutant. E) Quantitative analysis of RPA70 signal in CHO10B4(wt) cells. F) As in panel E, but for CHOK1(wt) cells. G) As in panel E, for Xrs6 cells. The results represent the mean and SE from 3 independent determinations.

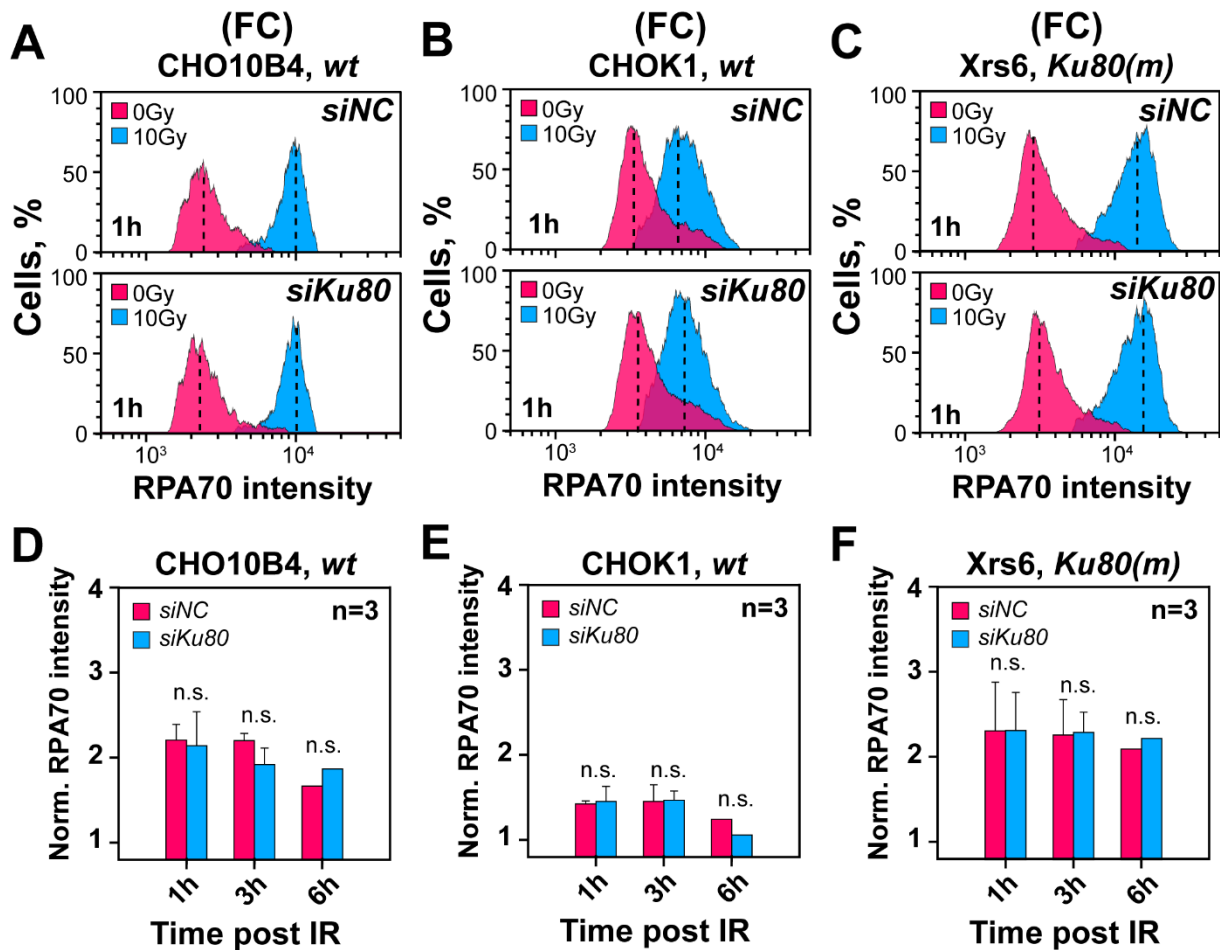

**Figure S4.** Resection after Ku knockdown in CHO cell lines. A) Representative histograms of RPA70 intensity in mock transfected and Ku depleted CHO10B4(wt) cells, obtained by FC analysis 1 h after exposure to 10 Gy. B) As in panel A, for CHOK1 cells. C) As in panel A, for Xrs6 cells. D) Quantitative analysis of RPA70 signal in CHO10B4 cells. E) As in panel D, for CHOK1 cells. F) As in panel D, for Xrs6 cells. The results represent the mean and SE from 3 independent determinations.

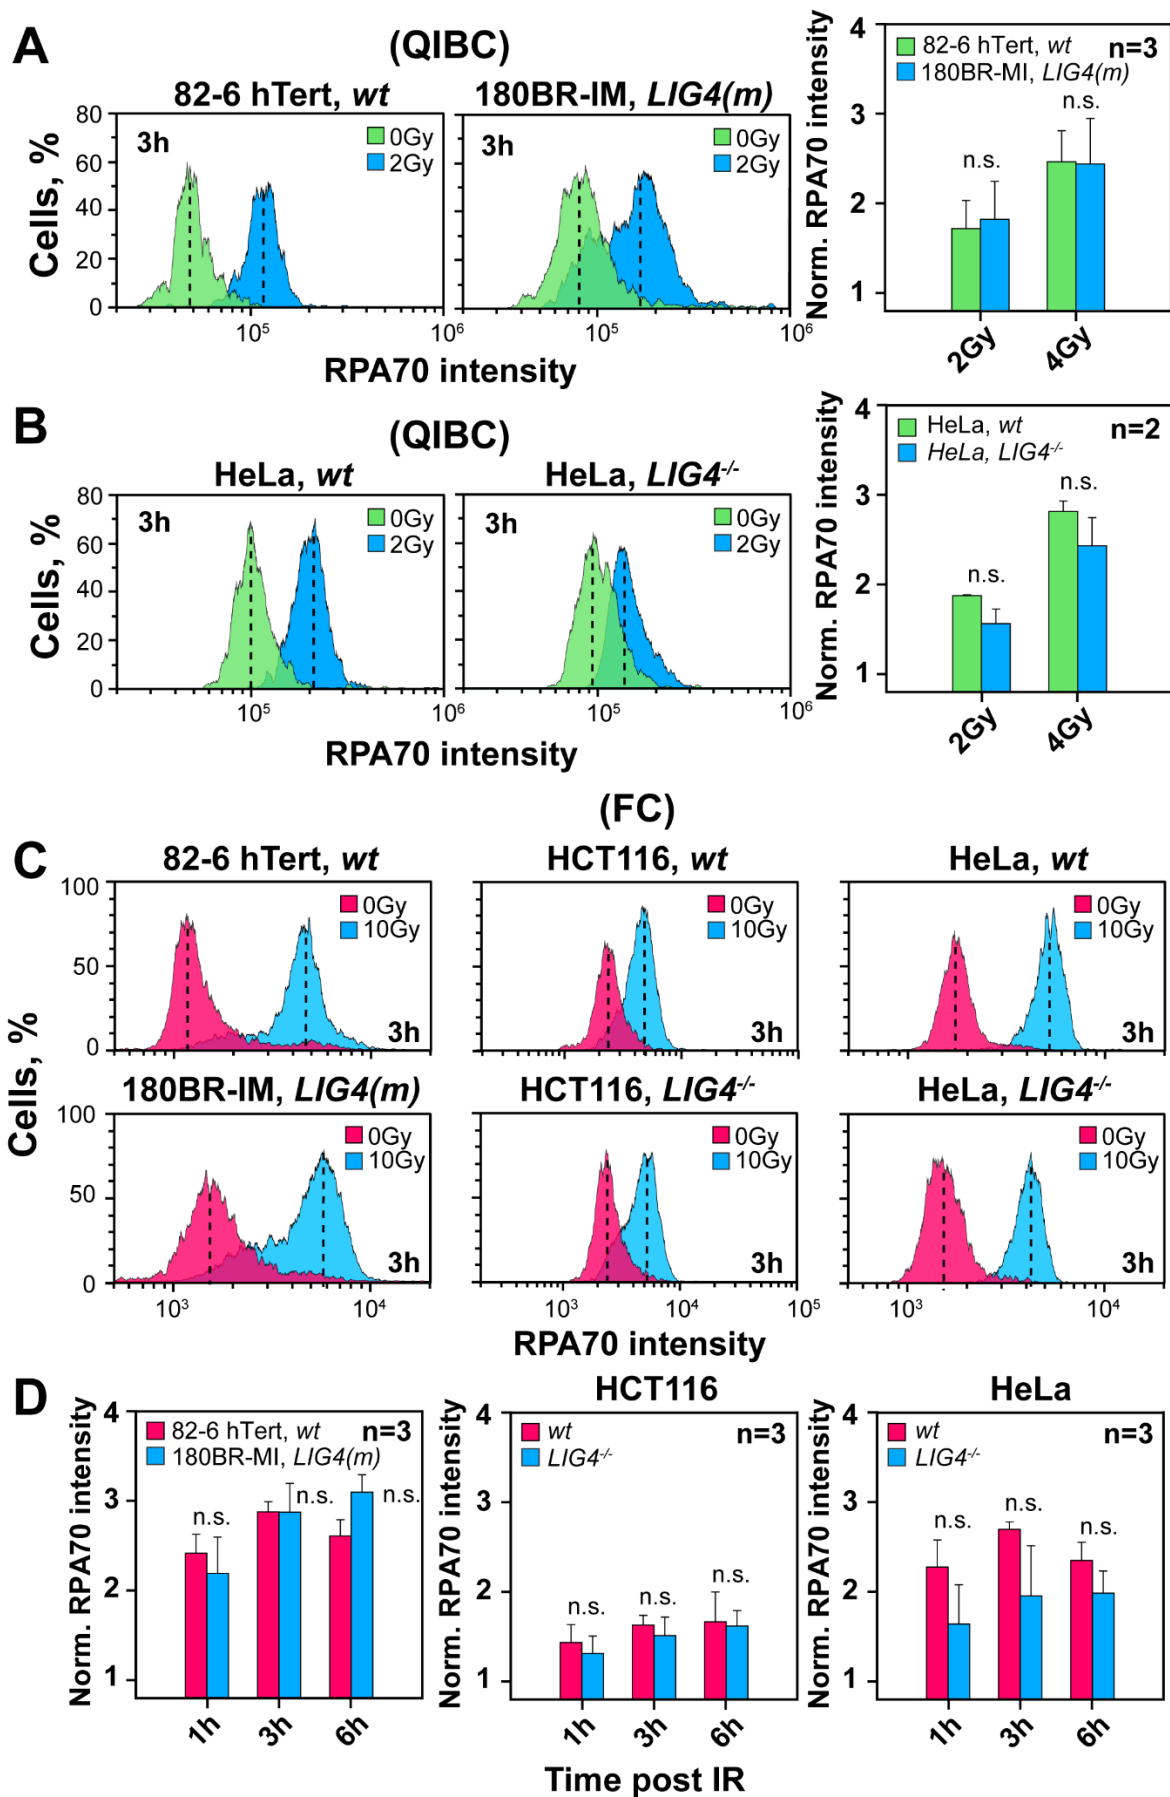



**Figure S5.** *Resection analysis in *LIG4* deficient cells.* A) QIBC analysis of RPA70 in wt, 82-6 hTert and *LIG4* deficient 180BR-M human cell lines. The bar plot is showing the normalized RPA70 signal intensity from three independent determinations. B) As in panel A for *LIG4* proficient and deficient HeLa cells. C) FC-based analysis of RPA70 signal intensity in human cell lines deficient in *LIG4*. Other details as in Figure 2B. D) Quantification of RPA70 signal from three experiments such as those shown in panel A.

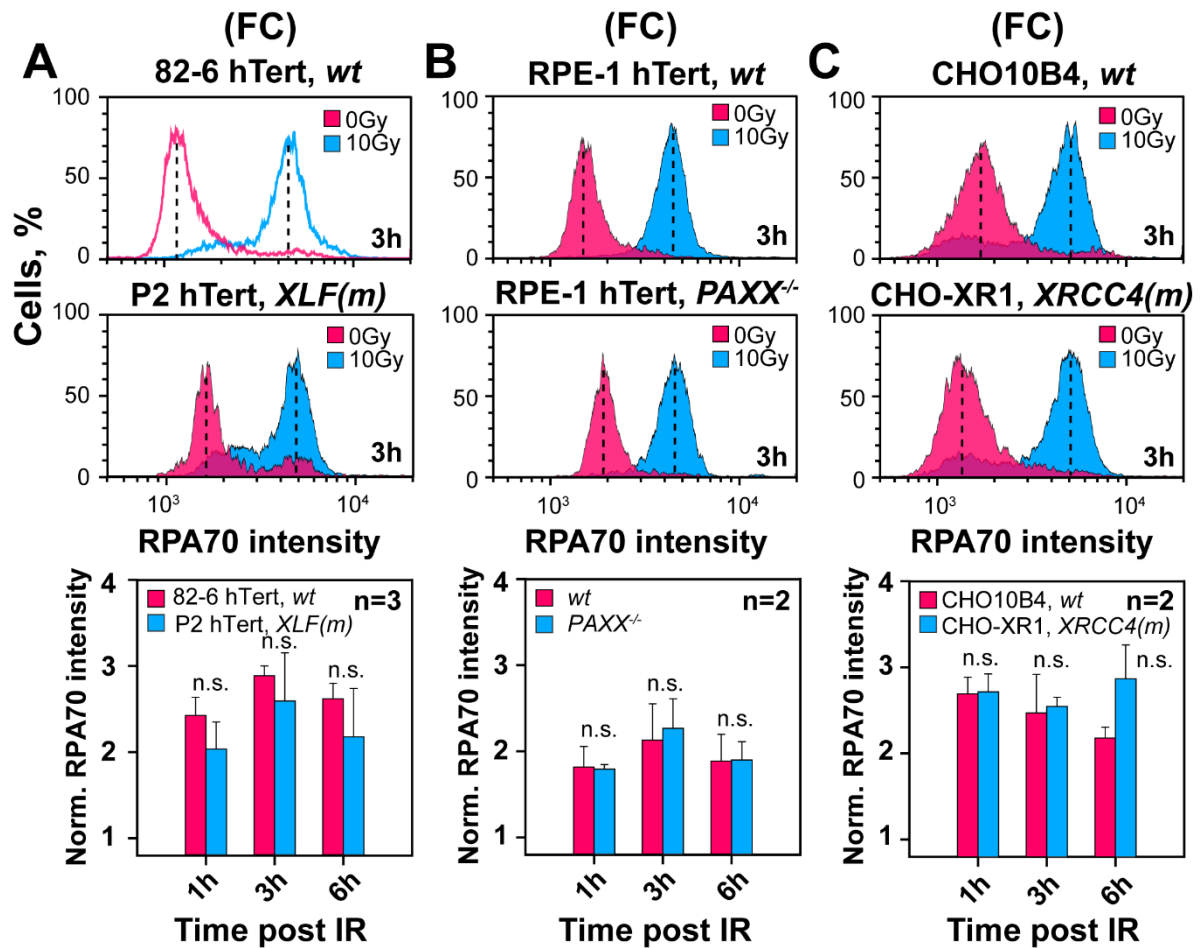

**Figure S6.** FC-based analysis of resection in *c-NHEJ* deficient cells. A) Resection in *XLF*<sup>-/-</sup> cells. B) Resection in *PAXX*<sup>-/-</sup> cells. C) Resection in *XRCC4*<sup>-/-</sup> cells. All cell lines were exposed to 10 Gy and analyzed at 1 h, 3 h, and 6 h after irradiation. The experiments are repeated thrice and the bar graphs at the bottom show the combined results. Plotted are the mean and SE from three independent experiments.

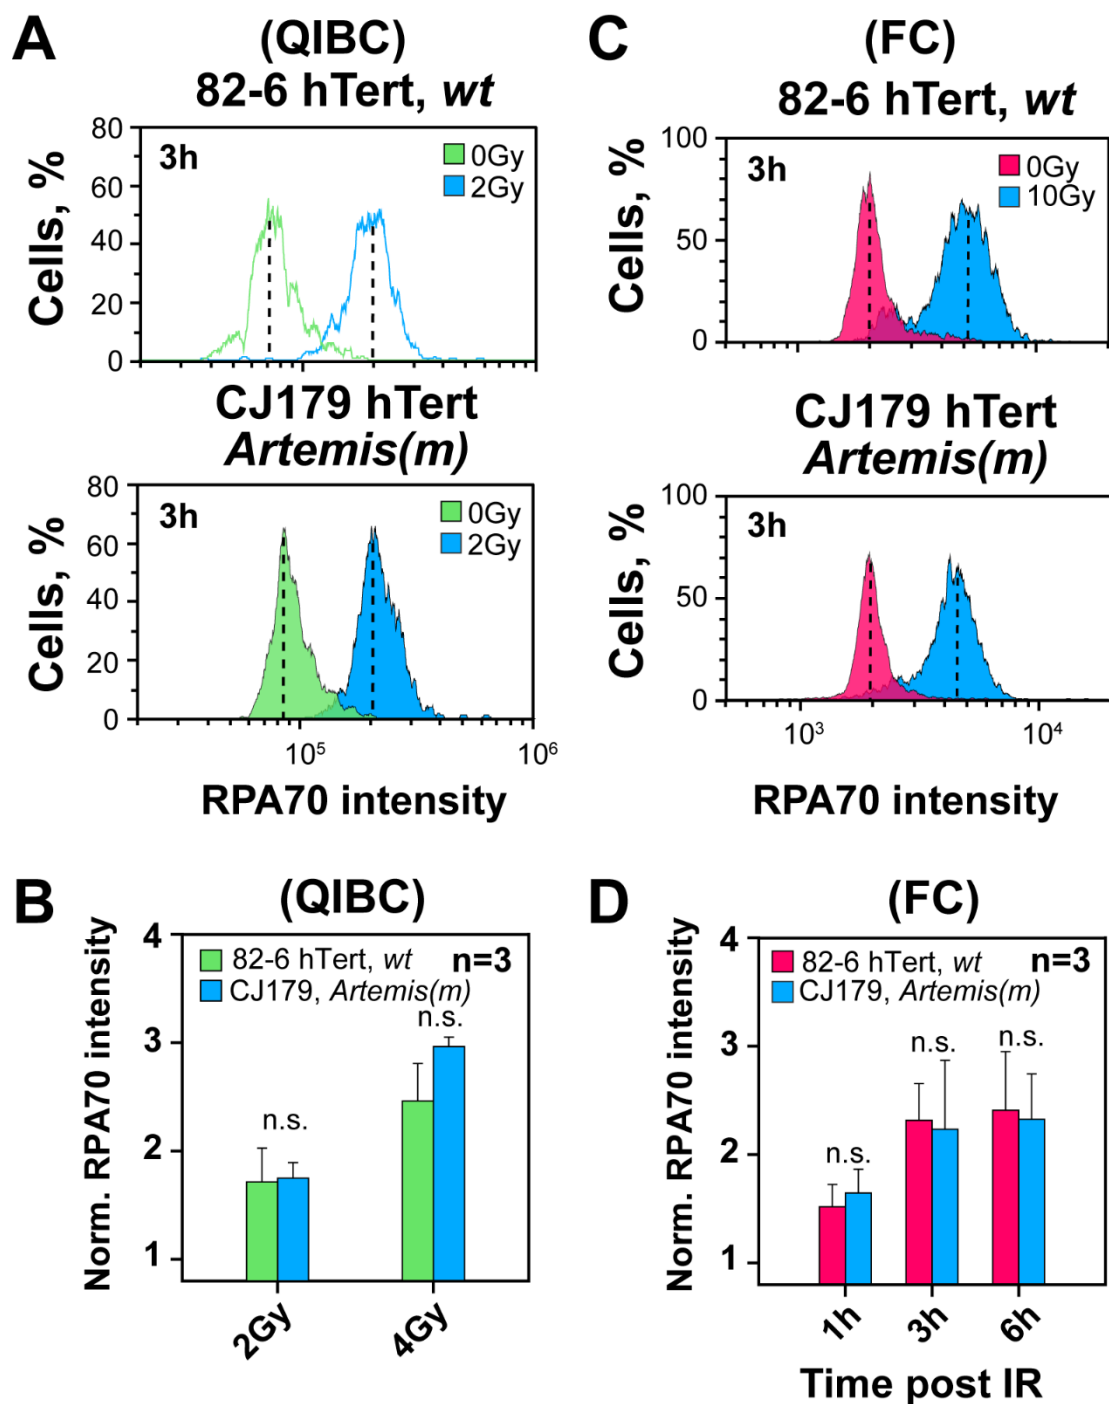

**Figure S7. Resection analysis in *Artemis*<sup>-/-</sup> cells.** A) RPA70 signal intensity determined using QIBC 3 h after exposure to 2 Gy or 4 Gy of IR (only data for 2 Gy are shown). B) Quantification of RPA70 signal intensity determined as shown in panel A. C) As in panel A, using FC after exposure to 10 Gy. D) As in panel B, for experiments shown in panel C. Plotted are the mean and SE from three independent experiments.

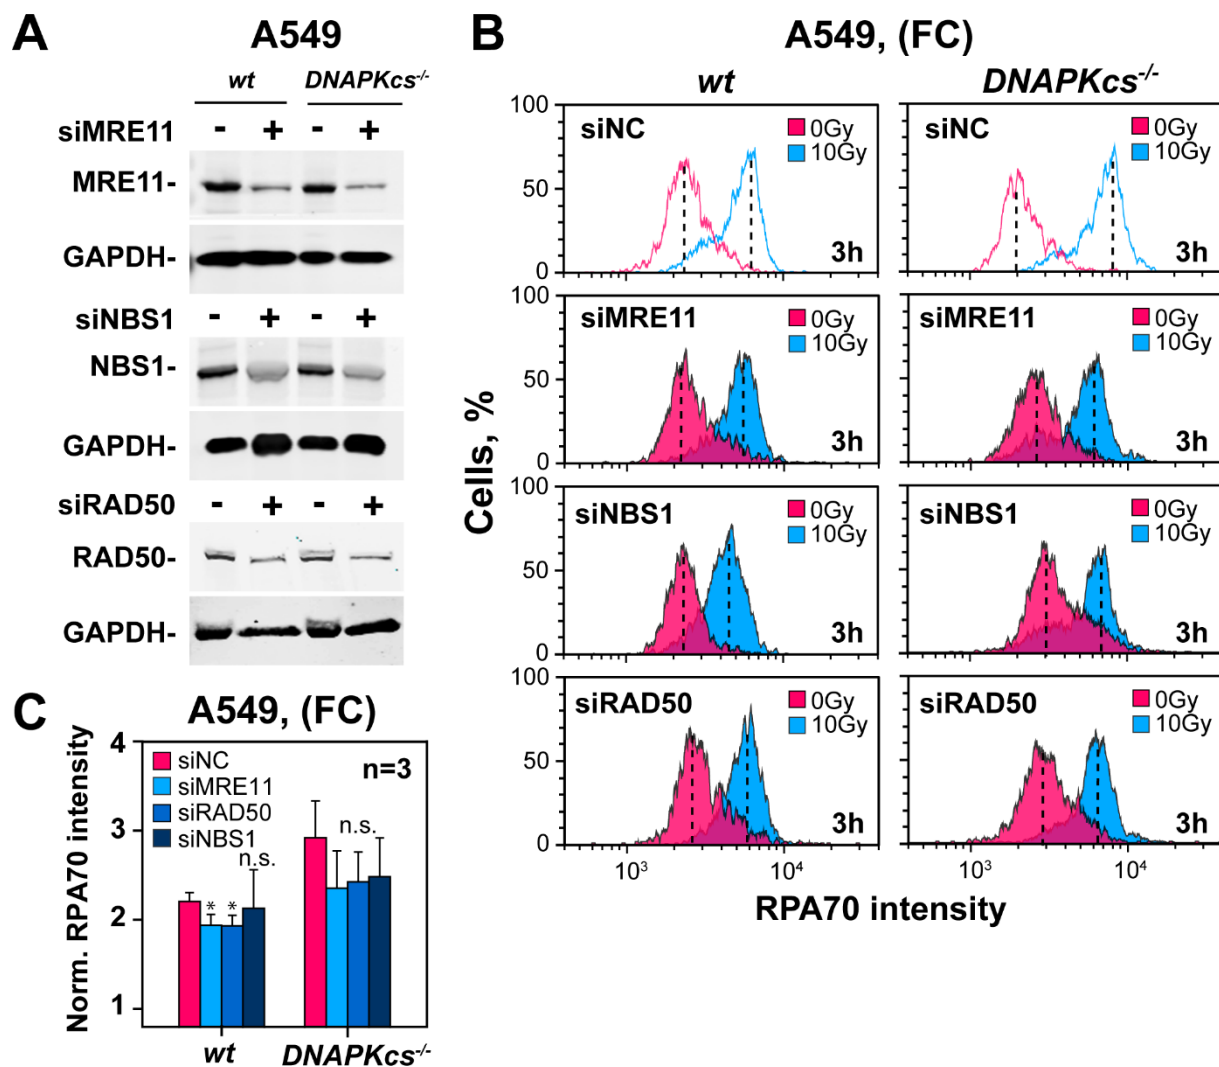

**Figure S8.** Resection analysis in *wt* and *DNA-PKcs<sup>-/-</sup>* A549 cells after depletion of components of the MRN complex. A) Western blot analysis showing the levels of MRE11, NBS1 and RAD50 in *wt* and *DNA-PKcs<sup>-/-</sup>* A549 cells after transfection with the corresponding siRNAs. B) Cell cycle specific FC analysis of RPA70 signal intensity, 3 h after exposure of MRN depleted cells to 10 Gy of IR. C) Quantification of RPA70 signal intensity shown in panel B. The results represent the mean and SE from 3 independent determinations.

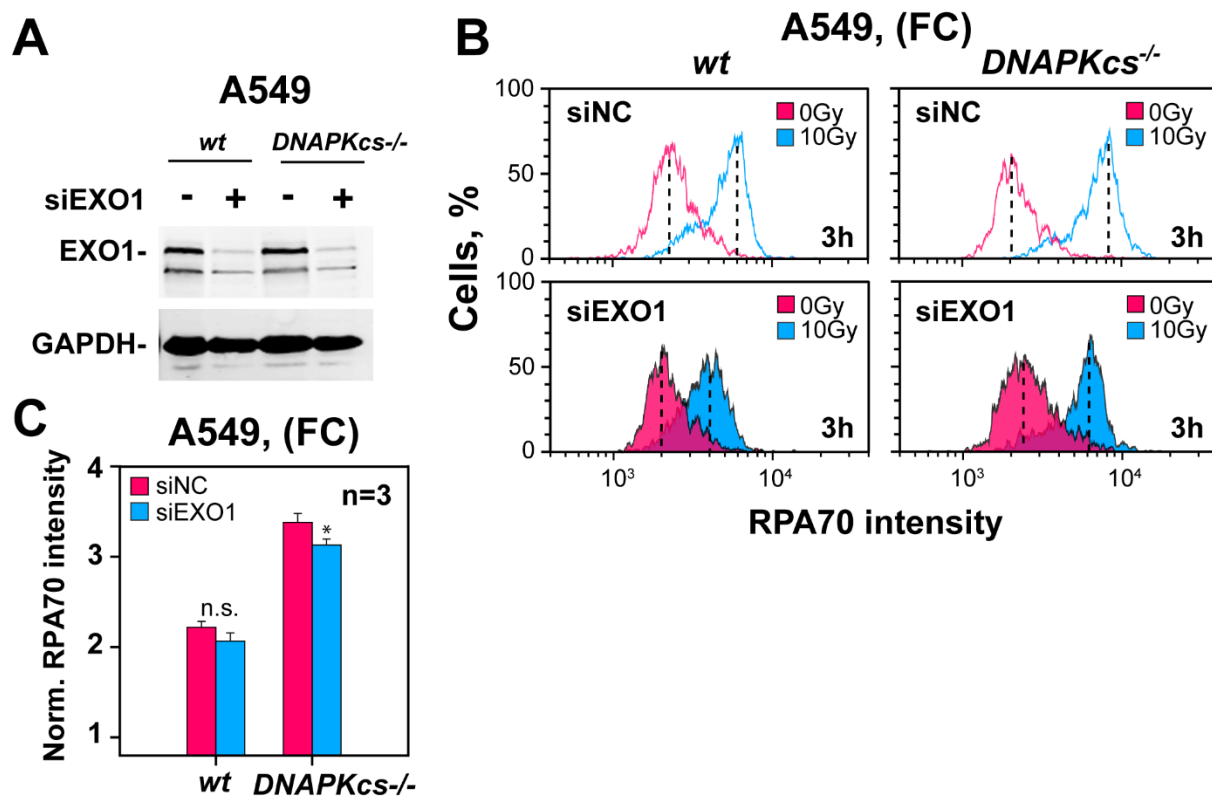

**Figure S9.** *Effects on resection of EXO1 depletion.* A) Western blot analysis showing the level of EXO1 after transfection with a specific EXO1 siRNAs. B) As in Figure 6B, for cells depleted for EXO1 by transfection with a specific EXO1 siRNA. C) As in Figure 6C, for cells depleted for EXO1.

**Table S1.** *Sequences of siRNA against human and hamster genes of interests.* For more information see the Materials and Methods.

| Target protein                 | siRNA                                                                      |
|--------------------------------|----------------------------------------------------------------------------|
| <b>Negative control (siNC)</b> | 1. UUCUCCGAACGUGUCACGU                                                     |
| <b>EXO1</b>                    | 1. GCCUUUGCUAUCCAAUCCCACG                                                  |
| <b>DNA2</b>                    | 1. AGACAAGGUUCCAGCGCCA                                                     |
| <b>CTIP</b>                    | 1. GCUAAAAC AGGAACGAAUC<br>2. GAUUCGUUCCUGUUUUAGC                          |
| <b>MRE11</b>                   | 1. GAUGCCAUUGAGGAAUAAG                                                     |
| <b>RAD50</b>                   | 1. UAAUGAGACUUGACAAUGA<br>2. ACACUCUUGGGUACAAUAA<br>3. ACAGAACUCCUCACUAAGA |
| <b>NBS1</b>                    | 1. UAACCUUGUUGGCCUGAAGUAGAUG<br>2. CAGGAUGGCUGUCAGGUUA                     |
| <b>BLM</b>                     | 1. GAGCACAUCUGUAAAUUAA<br>2. CAGGAUGGCUGUCAGGUUA                           |
| <b>DNA-PKcs</b>                | 1. CGGCUAACUCGCCAGUUUA                                                     |
| <b>Human KU80</b>              | 1. UUCCUUAUUGGCUUGUCGUUU<br>2. AAACGACAAGCCAUUAAGGAA                       |
| <b>Hamster Ku80</b>            | 1. GAAACUGUCUAUUGCUUAA<br>2. CCAUAGGGAAGAAGUUUGA<br>3. GGAUCCUAUGAGUGUUUA  |

**Table S2.** Statistical analysis of the results shown in main figures. For more information see the Materials and Methods.

|                                                                                                                                                                                                                                                                                                                                                                                                                                                                                                                                  |                                                                                                                                                                                                                                                                                                                                                                                                                                                                                                                                                                                                                                                                                                                                                                                                                                                 |                                                                                                                                                                                                                                                                                                                                                                                                                                                                                                                                                                                                                                            |
|----------------------------------------------------------------------------------------------------------------------------------------------------------------------------------------------------------------------------------------------------------------------------------------------------------------------------------------------------------------------------------------------------------------------------------------------------------------------------------------------------------------------------------|-------------------------------------------------------------------------------------------------------------------------------------------------------------------------------------------------------------------------------------------------------------------------------------------------------------------------------------------------------------------------------------------------------------------------------------------------------------------------------------------------------------------------------------------------------------------------------------------------------------------------------------------------------------------------------------------------------------------------------------------------------------------------------------------------------------------------------------------------|--------------------------------------------------------------------------------------------------------------------------------------------------------------------------------------------------------------------------------------------------------------------------------------------------------------------------------------------------------------------------------------------------------------------------------------------------------------------------------------------------------------------------------------------------------------------------------------------------------------------------------------------|
| <b>Figure1C</b><br>2Gy, wt vs DNAPKcs <sup>-/-</sup><br>P = 0.0013<br>4Gy, wt vs DNAPKcs <sup>-/-</sup><br>P = 0.0026<br><b>Figure1E</b><br>10Gy, 1h, wt vs DNAPKcs <sup>-/-</sup><br>P = 0.0494<br>10Gy, 3h, wt vs DNAPKcs <sup>-/-</sup><br>P = 0.0495<br>10Gy, 6h, wt vs DNAPKcs <sup>-/-</sup><br>P = 0.0433                                                                                                                                                                                                                 | <b>Figure3B</b><br>2Gy, CHO10B4 vs Xrs6<br>P = 0.7098<br>4Gy, CHO10B4 vs Xrs6<br>P = 0.8009<br><b>Figure3D</b><br>10Gy, 1h, CHO10B4 vs Xrs6<br>P = 0.8898<br>10Gy, 3h, CHO10B4 vs Xrs6<br>P = 0.8018<br>10Gy, 6h, CHO10B4 vs Xrs6<br>P = 0.0717<br><b>Figure3G</b><br>10Gy, 1h, siNC vs siKU80<br>P = 0.5974<br>10Gy, 3h, siNC vs siKU80<br>P = 0.3473<br>10Gy, 6h, siNC vs siKU80<br>P = 0.5025<br><b>Figure4A</b><br>2Gy, wt vs LIG4 <sup>-/-</sup><br>P = 0.9986<br>4Gy, wt vs LIG4 <sup>-/-</sup><br>P = 0.1747<br><b>Figure4B</b><br>2Gy, wt vs XLF(m)<br>P = 0.4116<br>4Gy, wt vs XLF(m)<br>P = 0.5100<br><b>Figure4C</b><br>2Gy, wt vs PAXX <sup>-/-</sup><br>P = 0.7155<br>4Gy, wt vs PAXX <sup>-/-</sup><br>P = 0.6523<br><b>Figure4E</b><br>CHO10B4 vs V3<br>P = 0.002<br>CHO10B4 vs XR1<br>P = 0.196<br>CHO10B4 vs Xrs6<br>P < 0.001 | <b>Figure5C</b><br>2Gy, wt vs LIG4 <sup>-/-</sup><br>P < 0.0001<br>4Gy, wt vs LIG4 <sup>-/-</sup><br>P = 0.0015<br><b>Figure5E</b><br>2Gy, wt vs XLF(m)<br>P = 0.0006<br>4Gy, wt vs XLF(m)<br>P < 0.0001<br><b>Figure6C</b><br>wt, siNC vs siDNA2<br>P = 0.0002<br>wt, siNC vs siBLM<br>P = 0.0001<br>wt, siNC vs siDNA2/siBLM<br>P = 0.0002<br>DNAPKcs <sup>-/-</sup> , siNC vs siDNA2<br>P < 0.0001<br>DNAPKcs <sup>-/-</sup> , siNC vs siBLM<br>P < 0.0001<br>DNAPKcs <sup>-/-</sup> , siNC vs siDNA2/siBLM<br>P < 0.0001<br><b>Figure6E</b><br>wt, untr vs DNA2i<br>P = 0.0001<br>DNAPKcs <sup>-/-</sup> , untr vs DNA2i<br>P < 0.0001 |
| <b>Figure2C</b><br>2Gy, CHOK1 vs XR-C1-3<br>P = 0.0001<br>4Gy, CHOK1 vs XR-C1-3<br>P = 0.0001<br>2Gy, CHOK1 vs V3<br>P = 0.0003<br>4Gy, CHOK1 vs V3<br>P = 0.0003<br>2Gy, CHOK1 vs Irs20<br>P = 0.0063<br>4Gy, CHOK1 vs Irs20<br>P = 0.0006<br><b>Figure2E</b><br>10Gy, 1h, CHOK1 vs XR-C1-3<br>P < 0.0001<br>10Gy, 3h, CHOK1 vs XR-C1-3<br>P = 0.0040<br>10Gy, 6h, CHOK1 vs XR-C1-3<br>P = 0.0069<br>10Gy, 1h, CHOK1 vs Irs20<br>P = 0.0015<br>10Gy, 3h, CHOK1 vs Irs20<br>P = 0.0302<br>10Gy, 6h, CHOK1 vs Irs20<br>P = 0.1054 |                                                                                                                                                                                                                                                                                                                                                                                                                                                                                                                                                                                                                                                                                                                                                                                                                                                 |                                                                                                                                                                                                                                                                                                                                                                                                                                                                                                                                                                                                                                            |

**Table S3.** Statistical analysis of the results shown in supplementary figures. For more information see the Materials and Methods.

|                                                                                                                                                                                                     |                                                                                                                                                                                                                                                                                                                                                                                                                                                                                                                      |                                                                                                                                                                                                                                                                                                                                                                                                                                                                                                                                                                                                                                                                                                                                               |                                                                                                                                                                                                                                                                                                                                                                                                                                                                                                                                                                                                                                                                                                                                         |                                                                                                                                                                                                                                                                                                                                                                                                                                                                              |
|-----------------------------------------------------------------------------------------------------------------------------------------------------------------------------------------------------|----------------------------------------------------------------------------------------------------------------------------------------------------------------------------------------------------------------------------------------------------------------------------------------------------------------------------------------------------------------------------------------------------------------------------------------------------------------------------------------------------------------------|-----------------------------------------------------------------------------------------------------------------------------------------------------------------------------------------------------------------------------------------------------------------------------------------------------------------------------------------------------------------------------------------------------------------------------------------------------------------------------------------------------------------------------------------------------------------------------------------------------------------------------------------------------------------------------------------------------------------------------------------------|-----------------------------------------------------------------------------------------------------------------------------------------------------------------------------------------------------------------------------------------------------------------------------------------------------------------------------------------------------------------------------------------------------------------------------------------------------------------------------------------------------------------------------------------------------------------------------------------------------------------------------------------------------------------------------------------------------------------------------------------|------------------------------------------------------------------------------------------------------------------------------------------------------------------------------------------------------------------------------------------------------------------------------------------------------------------------------------------------------------------------------------------------------------------------------------------------------------------------------|
| <b>FigureS2B</b><br>1Gy, untr vs DNAPKcsi<br>P = 0.0009<br>4Gy, untr vs DNAPKcsi<br>P = 0.0266<br><b>FigureS2D</b><br>A549, untr vs DNAPKcsi<br>P = 0.3421<br>M059K, untr vs DNAPKcsi<br>P = 0.6778 | <b>FigureS4D</b><br>10Gy, 1h, CHO10B4, siNC vs siKu80<br>P = 0.8095<br>10Gy, 3h, CHO10B4, siNC vs siKu80<br>P = 0.0784<br>10Gy, 6h, CHO10B4, siNC vs siKu80<br>P = 0.1835<br><b>FigureS4E</b><br>10Gy, 1h, CHOK1, siNC vs siKu80<br>P = 0.8012<br>10Gy, 3h, CHOK1, siNC vs siKu80<br>P = 0.9130<br>10Gy, 6h, CHOK1, siNC vs siKu80<br>P = 0.2703<br><b>FigureS4F</b><br>10Gy, 1h, Xrs6, siNC vs siKu80<br>P = 0.9917<br>10Gy, 3h, Xrs6, siNC vs siKu80<br>P = 0.9539<br>10Gy, 6h, Xrs6, siNC vs siKu80<br>P = 0.7584 | <b>Figure5A</b><br>2Gy, wt vs LIG4(m)<br>P = 0.7499<br>4Gy, wt vs LIG4(m)<br>P = 0.9483<br><b>Figure5B</b><br>2Gy, wt vs LIG4 <sup>-/-</sup><br>P = 0.9623<br>4Gy, wt vs LIG4 <sup>-/-</sup><br>P = 0.1187<br><b>Figure5SD</b><br>10Gy, 1h, wt vs LIG4(m)<br>P = 0.4409<br>10Gy, 3h, wt vs LIG4(m)<br>P = 0.9884<br>10Gy, 6h, wt vs LIG4(m)<br>P = 0.0737<br><b>Figure5SD, HCT116</b><br>10Gy, 1h, wt vs LIG4 <sup>-/-</sup><br>P = 0.4946<br>10Gy, 3h, wt vs LIG4 <sup>-/-</sup><br>P = 0.4339<br>10Gy, 6h, wt vs LIG4 <sup>-/-</sup><br>P = 0.8338<br><b>Figure5SD, HeLa</b><br>10Gy, 1h, wt vs LIG4 <sup>-/-</sup><br>P = 0.1075<br>10Gy, 3h, wt vs LIG4 <sup>-/-</sup><br>P = 0.0856<br>10Gy, 6h, wt vs LIG4 <sup>-/-</sup><br>P = 0.1208 | <b>FigureS6A</b><br>10Gy, 1h, wt vs XLF(m)<br>P = 0.1494<br>10Gy, 3h, wt vs XLF(m)<br>P = 0.5396<br>10Gy, 6h, wt vs XLF(m)<br>P = 0.3477<br><b>FigureS6B</b><br>10Gy, 1h, wt vs PAXX <sup>-/-</sup><br>P = 0.8723<br>10Gy, 3h, wt vs PAXX <sup>-/-</sup><br>P = 0.6840<br>10Gy, 6h, wt vs PAXX <sup>-/-</sup><br>P = 0.9533<br><b>FigureS6C</b><br>10Gy, 1h, wt vs XRCC4(m)<br>P = 0.8898<br>10Gy, 3h, wt vs XRCC4(m)<br>P = 0.7875<br>10Gy, 6h, wt vs XRCC4(m)<br>P = 0.0717<br><b>FigureS7B</b><br>2Gy, wt vs Artemis(m)<br>P = 0.8659<br>4Gy, wt vs Artemis(m)<br>P = 0.0718<br><b>FigureS7D</b><br>10Gy, 1h, wt vs Artemis(m)<br>P = 0.4946<br>10Gy, 3h, wt vs Artemis(m)<br>P = 0.4339<br>10Gy, 6h, wt vs Artemis(m)<br>P = 0.8338 | <b>FigureS8C</b><br>A549, wt, siNC vs siMRE11<br>P = 0.0426<br>A549, wt, siNC vs siNBS1<br>P = 0.0370<br>A549, wt, siNC vs siRAD50<br>P = 0.7767<br>A549, DNAPKcs <sup>-/-</sup> , siNC vs siMRE11<br>P = 0.1711<br>A549, DNAPKcs <sup>-/-</sup> , siNC vs siNBS1<br>P = 0.1810<br>A549, DNAPKcs <sup>-/-</sup> , siNC vs siRAD50<br>P = 0.2751<br><b>FigureS9B</b><br>A549, wt, siNC vs siEXO1<br>P = 0.0773<br>A549, DNAPKcs <sup>-/-</sup> , siNC vs siEXO1<br>P = 0.0773 |
|-----------------------------------------------------------------------------------------------------------------------------------------------------------------------------------------------------|----------------------------------------------------------------------------------------------------------------------------------------------------------------------------------------------------------------------------------------------------------------------------------------------------------------------------------------------------------------------------------------------------------------------------------------------------------------------------------------------------------------------|-----------------------------------------------------------------------------------------------------------------------------------------------------------------------------------------------------------------------------------------------------------------------------------------------------------------------------------------------------------------------------------------------------------------------------------------------------------------------------------------------------------------------------------------------------------------------------------------------------------------------------------------------------------------------------------------------------------------------------------------------|-----------------------------------------------------------------------------------------------------------------------------------------------------------------------------------------------------------------------------------------------------------------------------------------------------------------------------------------------------------------------------------------------------------------------------------------------------------------------------------------------------------------------------------------------------------------------------------------------------------------------------------------------------------------------------------------------------------------------------------------|------------------------------------------------------------------------------------------------------------------------------------------------------------------------------------------------------------------------------------------------------------------------------------------------------------------------------------------------------------------------------------------------------------------------------------------------------------------------------|
